# Supplementary material for: Simultaneous deposition of cerium oxide and gold nanostructures-characterization and analytical properties toward glucose electro-oxidation and sensing
Source: Royal Society of Chemistry journal article supplement (doi:10.1039/c4ra05374e), 2014-08-08
Supplement: c4ra05374e1.pdf [file c4ra05374e1.pdf]

## Supporting Information

### **Simultaneous deposition of cerium oxide and gold nanostructures- characterization and analytical properties toward glucose electrooxidation and sensing**

Maxime Gougis,<sup>a</sup> Antonio Pereira,<sup>b</sup> Dongling Ma<sup>a</sup> and Mohamed Mohamedi\*<sup>a</sup>

<sup>a</sup>INRS-Énergie, Matériaux et Télécommunications, 1650 Boulevard Lionel Boulet, Varennes, Québec, Canada J3X 1S2. E-mail: [mohamedi@emt.inrs.ca](mailto:mohamedi@emt.inrs.ca); Fax: +1450-929-8102; Tel: +1 5142286831

<sup>b</sup>Institut Lumière Matière - UMR 5306, Université Claude Bernard Lyon 1, 10 rue Ada Byron, 69622, Villeurbanne cedex, France

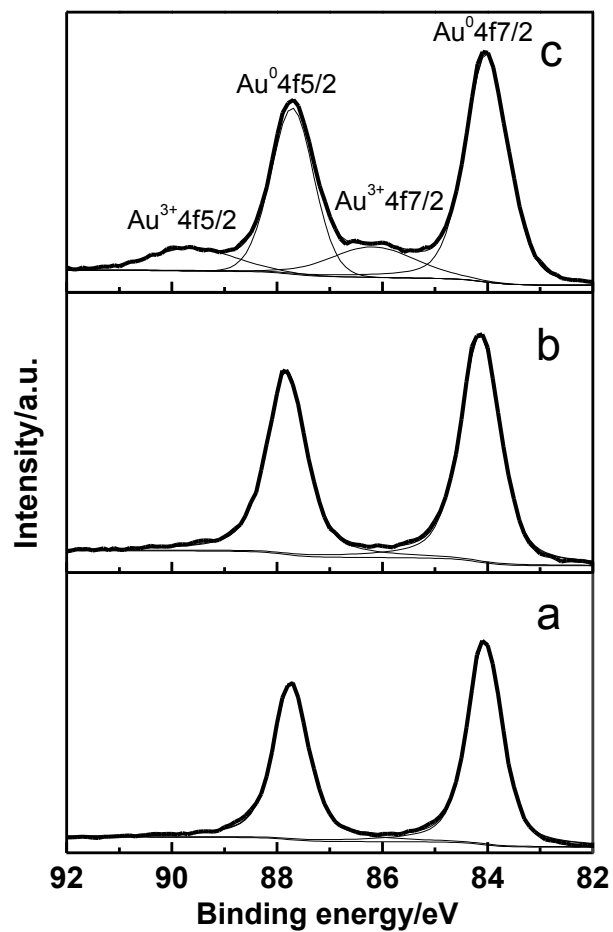

**Figure S1** High-resolution XPS spectra of the Au 4f region in CeO<sub>2</sub>-Au nanocomposites deposited under different background atmospheres: (a) vacuum (b) 0.5 Torr of Helium, and (c) 10 mTorr of oxygen.

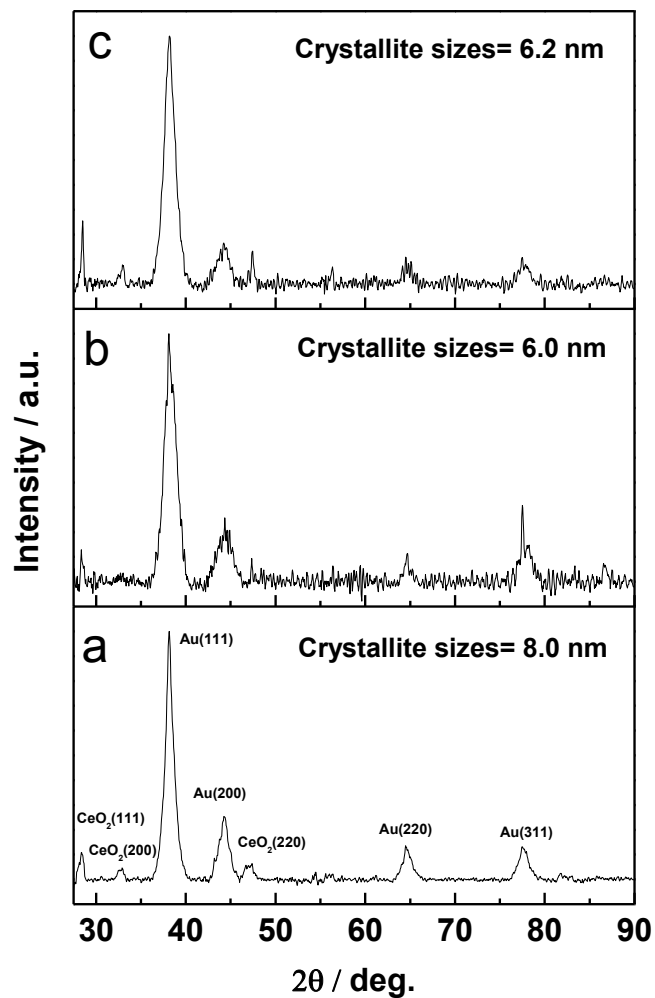

**Figure S2** XRD profiles and crystallite sizes of Au in  $\text{CeO}_2$ -Au nanocomposites deposited under different background atmospheres: (a) vacuum (b) 0.5 Torr of Helium, and (c) 10 mTorr of oxygen.

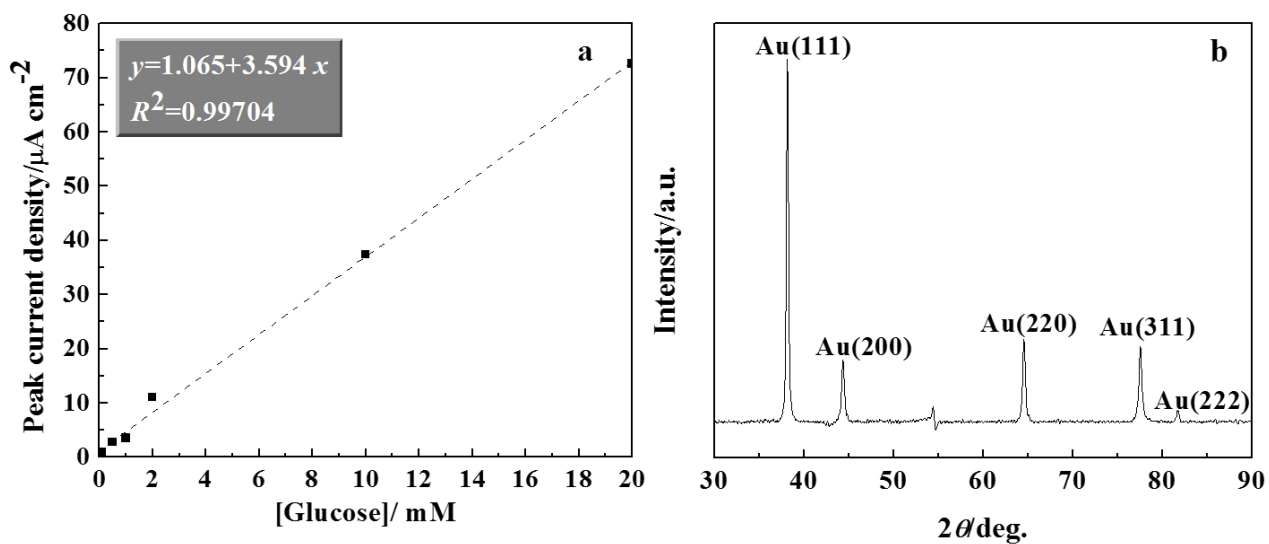

**Figure S3** (a) Linearity domain obtained with CP/Au electrode in argon-saturated 0.01 M PBS solution at pH 7.2 containing various glucose concentrations (b) The XRD profile of gold deposited onto carbon paper substrate. The average crystallite sizes of Au calculated using the Debye-Scherrer equation and the most intense (111) diffraction peak is 34.8 nm.
